1 **In-depth characterization of HIV-1 reservoirs reveals links to viral rebound during**  
2 **treatment interruption**

3 Basiel Cole<sup>1,#</sup>, Laurens Lambrechts<sup>1,2,#</sup>, Zoe Boyer<sup>3</sup>, Ytse Noppe<sup>1</sup>, Marie-Angélique De  
4 Scheerder<sup>4</sup>, John-Sebastian Eden<sup>3</sup>, Bram Vrancken<sup>5</sup>, Timothy E. Schlub<sup>6</sup>, Sherry  
5 McLaughlin<sup>7</sup>, Lisa M. Frenkel<sup>7,8</sup>, Sarah Palmer<sup>3,#</sup>, Linos Vandekerckhove<sup>1,4,#,\*</sup>

6 **Affiliations**

7 <sup>1</sup>HIV Cure Research Center, Department of Internal Medicine and Pediatrics, Ghent  
8 University Hospital, Ghent University, Ghent 9000, Belgium.

9 <sup>2</sup>BioBix, Department of Data Analysis and Mathematical Modelling, Faculty of  
10 Bioscience Engineering, Ghent University, Ghent 9000, Belgium

11 <sup>3</sup>Centre for Virus Research, The Westmead Institute for Medical Research, The  
12 University of Sydney, Sydney 2145, NSW, Australia.

13 <sup>4</sup>Department of General Internal Medicine and Infectious Diseases, Ghent University  
14 Hospital, Corneel Heymanslaan 10, Ghent 9000, Belgium.

15 <sup>5</sup>Department of Microbiology, Immunology and transplantation, Rega Institute,  
16 Laboratory of Evolutionary and Computational Virology, KU Leuven-University of  
17 Leuven, Leuven 3000, Belgium.

18 <sup>6</sup>University of Sydney, Faculty of Medicine and Health, Sydney School of Public Health,  
19 Sydney 2000, NSW, Australia.

20 <sup>7</sup>Center for Global Infectious Disease Research, Seattle Children's Research Institute,  
21 Seattle, Washington, United States of America.

22 <sup>8</sup>Departments of Global Health, Laboratory Medicine, Medicine, and Pediatrics,  
23 University of Washington, Seattle, Washington, United States of America.

24 #These authors contributed equally

25 \*Correspondence to:

26 Prof. Dr. Linos Vandekerckhove

27 Department of Internal Medicine and Pediatrics

28 Corneel Heymanslaan 10, 9000 Ghent, Belgium

29 Ghent University

30 Linos.Vandekerckhove@UGent.be

31 **Abstract**

32           The HIV-1 reservoir is composed of cells harboring latent proviruses that are  
33 capable of refuelling viremia upon antiretroviral treatment interruption. This reservoir is in  
34 part maintained by clonal expansion of infected cells. However, the contribution of large,  
35 infected cell clones to rebound remains underexplored. Here, we performed an in-depth  
36 study on four chronically treated HIV-1 infected individuals that underwent an analytical  
37 treatment interruption (ATI). A combination of single-genome sequencing, integration site  
38 analysis, near-full length proviral sequencing and multiple displacement amplification was  
39 used to identify infected cell clones and link these to plasma viruses before and during an  
40 ATI. A total of six proviruses could be linked to plasma sequences recovered during ATI.  
41 Interestingly, only two of six proviruses were genome intact, one of which is integrated in  
42 the *ZNF141* gene. To our knowledge, this is the first instance of an intact provirus with its  
43 matched IS being matched to plasma virus during an ATI.

44           These findings demonstrate that with in-depth reservoir characterization, clones of  
45 infected cells harboring genome-intact proviruses can be linked to rebound viremia,  
46 confirming the previously proposed notion that infected clonal cell populations play an  
47 important role in the long-term maintenance of the replication-competent HIV-1 reservoir.

## 48 Introduction

49 HIV-1 infection remains incurable due to the presence of a persistent viral  
50 reservoir, capable of rebounding upon treatment interruption (TI) (1–4). Despite efforts to  
51 better understand the dynamics and maintenance of the HIV-1 viral reservoir, pinpointing  
52 the origins of viruses that rebound remains elusive (5). Previously, it was shown that  
53 CD4+ T cells carrying an HIV-1 provirus in their genome can undergo clonal expansion,  
54 contributing to the long-term persistence of the HIV-1 viral reservoir during antiretroviral  
55 therapy (ART) (6–14). The observation that low level viremias (LLV) under ART (15–20)  
56 and rebound viremia upon TI (5,19,21,22) often consist of monotypic populations of  
57 viruses, suggest that HIV-1 infected cell clones are key contributors to refueling viremia  
58 during TI. Clonality of infected cells has historically been demonstrated by recovering  
59 identical proviral sequences or identical integration sites (IS) in multiple cells (8,9,23–27).  
60 While the former method allows for qualitative assessment of the proviral genome, it is  
61 often not adequate to confidently predict clonal expansion of HIV-1 infected cells,  
62 especially when evaluating a short subgenomic region (28,29). On the other hand,  
63 integration site analysis (ISA) provides direct proof of clonal expansion, though it typically  
64 leaves the proviral sequence uncharacterized. Recently, two techniques to link near full-  
65 length (NFL) proviral sequences to IS were developed by Einkauf *et al.* (14) and Patro *et*  
66 *al.* (30), respectively called *Matched Integration site and Proviral sequencing* (MIP-Seq)  
67 and *Multiple Displacement Amplification Single Genome Sequencing* (MDA-SGS). These  
68 assays combine the qualitative strength of NFL HIV-1 sequencing with ISA, shedding light  
69 on the integration profile of intact versus defective proviruses.

70 Analytical treatment interruption (ATI) studies allow for the investigation of the  
71 dynamics and genetic makeup of rebounding viruses (21,31,32). To identify the source  
72 of rebounding viruses, we previously conducted the HIV-STAR (HIV-1 sequencing before  
73 analytical treatment interruption to identify the anatomically relevant HIV reservoir) study  
74 (5). During this study, in-depth sampling was performed on 11 chronically treated HIV-1  
75 infected participants prior to ATI. Cells were isolated from different anatomical  
76 compartments and sorted into several CD4+ T cell subsets. Subgenomic proviral  
77 sequences (V1-V3 region of *env*) were recovered and phylogenetically linked to  
78 sequences from rebounding plasma virus collected during different stages of the ATI. This  
79 study suggested that HIV-1 rebound is predominantly fueled by genetically identical viral  
80 expansions, highlighting the potentially important role of clonal expansion in the  
81 maintenance of the HIV-1 reservoir. While this set-up allowed for the generation of a very  
82 broad and comprehensive dataset, it left some questions unanswered. Most importantly,  
83 the evaluation of a short subgenomic region (V1-V3 *env*) to link proviral sequences to  
84 rebounding plasma virus made it impossible to investigate the entire genome structure of  
85 proviruses linked to rebound. Furthermore, the lack of ISA did not allow for the study of  
86 the chromosomal location of the rebounding versus non-rebounding proviruses.

87

88 To address these points, we performed a combination of multiple displacement  
89 amplification (MDA), ISA and NFL proviral sequencing on four participants that were  
90 enrolled in the HIV-STAR study, with special attention on clonally expanded HIV-1  
91 infected cells. We demonstrate that HIV-1 proviral sequences and corresponding IS of  
92 clonally expanded infected cells could be retrieved, and in rare cases these could be

93 linked to rebounding plasma viruses. To our knowledge, we report the first instance of an  
94 intact proviral sequence with its associated IS being linked to plasma virus identified  
95 during an ATI. This provirus is integrated in a gene of the Krüppel-associated box domain  
96 (KRAB) containing zinc finger nuclease (ZNF) family, which adds to the growing body of  
97 evidence that this class of genes is a hotspot for genetically intact proviruses in patients  
98 on long-term ART.

99

100

101

102

103

104

105

106

107

108

109

110

111

112

113

114

115

## 116 **Results**

### 117 **Experimental set-up**

118 To investigate the genetic composition and chromosomal location of proviruses  
119 stemming from clonally expanded cells, and their relationship to rebound viremia, several  
120 qualitative assays were performed on samples from chronically treated HIV-1 infected  
121 individuals undergoing an ATI (Supplemental Table 1). These individuals were sampled  
122 longitudinally before and during the ATI, as summarized in Figure 1A, B.

123 First, the overall landscape of HIV-1 infected cell clones prior to ATI (Timepoint 1  
124 (T1), Figure 1A) was determined by subgenomic single-genome sequencing (SGS) and  
125 Full-length Individual Proviral Sequencing (FLIPS) at the proviral level, and with  
126 Integration Site Loop Amplification (ISLA) at the integration site level (Figure 1A,  
127 Supplemental Table 1). This yielded three datasets that were used independently as a  
128 reference to identify potential clonally expanded infected cell populations.

129 In order to find links between the different datasets, multiple displacement  
130 amplification (MDA) was performed on sorted cell lysates from peripheral blood obtained  
131 during the pre-ATI timepoint (T1). MDA wells were subjected to V1-V3 *env* SGS and ISLA,  
132 and MDA reactions that yielded a V1-V3 *env* sequence and/or an IS corresponding to a  
133 suspected cellular clone, were further investigated. This was determined by an exact link  
134 to ISLA/FLIPS/SGS data generated in the first step, or by identical V1-V3 *env* sequences  
135 and/or IS shared between MDA wells. The proviruses in these selected MDA wells were  
136 sequenced using either a one-amplicon, four-amplicon, or five-amplicon approach, or a

137 combination thereof (see methods). These MDA sequences were subsequently mapped  
138 back to proviral FLIPS sequences and historic V1-V3 *env* proviral sequences from  
139 PBMCs, gut-associated lymphoid tissue (GALT) and lymph node (LN) subsets prior to  
140 ATI (T1, Figure 1B), as well as V1-V3 *env* plasma sequences retrieved during the ATI  
141 (Timepoints 2-4 (T2-T4), Figure 1B).

142 This set-up allowed for the assessment of the genetic structure of proviruses in  
143 clonally expanded infected cells, their placement across cellular subsets and anatomical  
144 compartments, and their contribution to refuelling viremia during an ATI.

#### 145 **Integration site analysis and full-length proviral sequencing**

146 To gain insight into the composition of the viral reservoirs of the four STAR  
147 participants, especially in terms of clonal expansion of infected cells, we initially  
148 performed bulk NFL proviral sequencing and ISA.

149 ISLA was performed on bulk cell lysate and on MDA-amplified cell lysate of TCM  
150 and TEM subsets from peripheral blood for three of the four study participants: STAR 9,  
151 STAR 10 and STAR 11 (Figure 2, Supplemental Table 2, Supplemental Table 4). Analysis  
152 of IS revealed a significantly higher degree of clonally expanded HIV-1 infected cells in  
153 the TEM proportion (mean 55%) compared to the TCM proportion (mean 16%) of the  
154 peripheral blood ( $P < 0.001$  for STAR 9 and STAR 11;  $P = 0.036$  for STAR 10), as  
155 previously reported (24). Identical IS between subsets, indicative of linear differentiation  
156 from an originally infected TCM into a TEM, was observed in rare instances, with 5 shared  
157 IS between subsets out of 284 distinct IS recovered (178 in TCM and 106 in TEM).

158           Near full-length HIV genomes (spanning 92% of the proviral genome) were  
159 recovered from TCM and TEM subsets in the peripheral blood and from CD45+ cells in  
160 the GALT for all four ART-treated participants before ATI (T1, Figure 1B). In addition,  
161 based on sample availability per participant, other cell subsets from the peripheral blood  
162 and LN were assayed with FLIPS as listed in Supplemental Table 1. This yielded a total  
163 number of 536 individual proviral genomes with a mean of 134 genomes per participant  
164 (Figure 2, Supplemental Table 3). Across all participants, only 30 (6%) intact proviral  
165 genomes were retrieved, with a majority of proviral sequences (68%, n=365) displaying  
166 large internal deletions (Supplemental Figure 1). In addition, the HIV-1 infection frequency  
167 differed significantly across cell subsets from the peripheral blood ( $P < 0.001$ ), with the  
168 TEM subset having the highest infection frequency, except for participant STAR 4  
169 (Supplemental Figure 2). Across the four participants, some deviations to the overall  
170 proportions of sequence types were observed, such as a higher fraction of hypermutated  
171 sequences (23%) in STAR 9 as compared to the overall proportion (15%) and a higher  
172 frequency of intact sequences (19%) in STAR 11 versus the overall frequency of 6%.  
173 These observations can be explained by cellular proliferation of HIV-1 infected cells as  
174 identified by expansions of identical sequences (EIS) in the FLIPS data. If proviruses  
175 belonging to such EIS are counted only once, these divergent proportions of  
176 hypermutated proviruses in STAR 9 and intact proviruses in STAR 11 disappear since  
177 they are driven by an EIS for that sequence type (Supplemental Figure 3). Furthermore,  
178 in each participant we observed more proviral genomes from the peripheral blood belong  
179 to an EIS in the TEM subset (mean average of 70%) than in the TCM subset (mean  
180 average of 34%), confirming the ISLA findings (Figure 2).



181 **Multiple displacement amplification-mediated characterization of near full-length**  
182 **proviruses**

183 MDA-mediated HIV-1 provirus sequencing and ISA offers the unique opportunity  
184 of linking NFL proviral sequences to their precise chromosomal location. Applying this  
185 technique to three of the four study participants, we could identify several expanded  
186 clones from which NFL sequences and matched IS could be retrieved, as shown in Figure  
187 3 (Supplemental Figure 4, Supplemental Table 4).

188 STAR 9 displayed one major hypermutated clone (14% of all retrieved proviral  
189 genomes), predominantly present in the peripheral blood TEM fraction and integrated at  
190 an intergenic location on chromosome 11 (Figure 3). Interestingly, this clone could also  
191 be retrieved in the peripheral blood in the TCM subset by ISLA, and in the TCM/TTM/TEM  
192 subsets by FLIPS, which is indicative of differentiation of a clonally expanded cell  
193 population harboring a defective, hypermutated provirus (Supplemental Figure 4).

194 For STAR 10, one major clonally expanded cell population was found in the  
195 peripheral blood TCM fraction, with a provirus integrated in the *STAT5B* gene (Figure 3).  
196 This gene has previously been found to be significantly overrepresented in HIV-1 IS  
197 datasets (8,9,33,34). In most of these cases, the integration took place in the first intron  
198 in the same orientation as the gene, which can lead to aberrant transcription and  
199 production of the STAT5B protein (27,34). In this case however, the provirus was  
200 integrated against the orientation of the gene, in the first intron. Also, the provirus was  
201 shown to be defective, with a packaging signal defect in the form of a 25-bp deletion in  
202 stem loop 2 at the 5' end of the genome. Three more clonal NFL genomes were retrieved

203 in STAR 10, all with packaging signal or multiple splice donor site (MSD) defects: one in  
204 an intergenic region on chromosome 8, one in the long non-coding RNA gene  
205 *LINC00649*, and the third in the *CASC5* gene. One clonal intact NFL provirus was  
206 detected in an intronic region of the *CIT* gene, in the same orientation as the gene (Figure  
207 3, Supplemental Figure 4).

208 With FLIPS, three different EIS containing genetically intact sequences were  
209 identified in the peripheral blood TEM fraction of STAR 11, which represent 10%, 5% and  
210 3% of all NFL sequences retrieved in that subset. These EIS were also detected in several  
211 MDA wells, which enabled the identification of their corresponding IS. Looking at these  
212 clones at the IS level, they represent 7%, 19% and 2% of IS retrieved by ISLA in the  
213 peripheral blood TEM fraction, and are integrated in the *GGNBP2* gene, *ZNF274* gene  
214 and the *ZNF141* gene respectively. The provirus in the *GGNBP2* gene was integrated in  
215 the sixth intron, in the same orientation as the gene. Of note, this clone was not only  
216 observed in the TEM fraction but was also retrieved in the TCM fraction of the peripheral  
217 blood by both ISLA and FLIPS. The proviruses in the *ZNF141* gene and the *ZNF274* gene  
218 were integrated in the reverse orientation with respect to the gene. Interestingly, these  
219 genes belong to categories that have recently been described as harboring proviruses  
220 responsible for non-suppressed viremia, and 'deep latency' respectively (20,35). Finally,  
221 two proviruses with small deletions in the packaging signal and MSD were found in  
222 intergenic regions of chromosome 17 (Figure 3).

223 We conclude that a large fraction of the clonally expanded infected cell populations  
224 we identified harbor defective proviruses that would not be able to rebound during an ATI,

225 however, in participant STAR 11, three clonal cell populations were identified that harbor  
226 a genetically intact provirus.

227 **Large discrepancies between suspected clonal HIV-1 infected cell populations**  
228 **identified with ISLA, SGS and FLIPS**

229 ISLA, SGS and FLIPS can independently be used to assess clonality of infected  
230 cells, the former based on the integration site and the two latter on the (subgenomic)  
231 proviral sequence of the provirus. To investigate whether the methods appear biased in  
232 their ability to detect specific clones, we used V1-V3 *env* or NFL sequences to assess  
233 overlap between assays (Figure 4).

234 Matches between MDA-ISLA data and FLIPS data were based on NFL sequences,  
235 whereas other links were based on V1-V3 *env* sequences. The Elimdupes tool (LANL)  
236 was used to identify EIS, which were validated by construction of maximum-likelihood  
237 (ML) trees using PHYML. For NFL matches, a total of 3-bp differences were allowed, to  
238 account for PCR-induced errors and sequencing errors, where for V1-V3 *env* matches,  
239 100% accordancy was required. In the case of IS data, only those IS that were associated  
240 with a corresponding V1-V3 *env* sequence (as found with MDA) could be linked. For  
241 FLIPS sequences, proviruses that have an internal deletion covering the V1-V3 *env*  
242 region could not be linked to SGS data.

243 Upon comparison of EIS present in SGS data and FLIPS data from participant  
244 STAR 4, one clear overlap could be found, in the peripheral blood TCM fraction. All other  
245 proviral sequences retrieved with SGS could not be linked unequivocally to sequences

246 derived by using FLIPS, indicating a significant primer bias. However, one V1-V3 *env*  
247 sequence found with SGS in the TEM and the TCM fractions perfectly matched two  
248 distinct FLIPS sequences (Figure 4, green arrow). This is an example of a presumed  
249 'clonal' EIS detected with SGS that consists of two or more proviruses sharing the same  
250 V1-V3 *env* region, although differing elsewhere in their genome.

251 A similar picture was observed for STAR 9, with only limited overlaps between  
252 assays. One major clone, integrated in an intergenic region on chromosome 11, was  
253 detected with both MDA-ISLA and FLIPS. In both assays, this clone was predominantly  
254 found in the peripheral blood TEM fraction (23% and 29% respectively), but also  
255 appeared in the peripheral blood TCM fraction. Strikingly, this provirus was never  
256 amplified with SGS, which can be explained by the fact that V1-V3 *env* primers did not  
257 anneal to this hypermutated sequence. This is another example of primer bias, which in  
258 this case can be explained by the hypermutated nature of the provirus.

259 Participant STAR 10 displays several instances of clear discrepancies between  
260 the assays. One large suspected EIS, based on V1-V3 *env* SGS, could be linked to four  
261 different IS (Figure 4, blue arrow). This most likely is the result of multiple distinct  
262 proviruses sharing a similar V1-V3 *env* sequence but integrated at different sites.  
263 Alternatively, this observation could result from MDA reactions containing more than one  
264 provirus, however, there was no evidence of mixed sequences observed from these wells.  
265 In addition, similar to the STAR 4 observation, one V1-V3 *env* sequence from the SGS  
266 data could be linked to two different NFL sequences, again indicating that in some cases  
267 subgenomic regions can be linked to different full-length sequences (Figure 4, red arrow).

268 Remarkable consistency between assays was observed for STAR 11, with all the  
269 clonal NFL sequences being linked to both SGS and MDA-ISLA data (Figure 4). However,  
270 the largest clone based on ISLA data, integrated in the *ZFC3H1* gene (Figure 2), could  
271 not be linked to SGS and FLIPS data, which was probably the result of large internal  
272 deletions spanning the entire length of the genome. In fact, out of ten MDA wells that  
273 yielded this integration site, the proviral sequence could never be amplified by V1-V3 *env*  
274 SGS, or by one-, four- or a five-amplicon approach NFL sequencing (Supplemental Table  
275 4).

276 To quantify the discrepancies between assays, the clonal prediction score (CPS,  
277 described by Laskey *et al.* (28)) for the V1-V3 *env* region was calculated for all participants  
278 individually, based on available FLIPS data (Supplemental Table 5). The CPS for STAR  
279 4 and STAR 10 were 96% and 95% respectively, while the CPS was 100% for both STAR  
280 9 and STAR 11. This is consistent with the aberrant results described above in STAR 4  
281 and STAR 10, where identical V1-V3 *env* sequences could be linked to distinct IS and/or  
282 distinct NFL sequences. To investigate whether this is the result of limited genomic  
283 variability, the average nucleotide distances of all participants were calculated based on  
284 V1-V3 SGS *env* data. This revealed that indeed, participants with a lower CPS displayed  
285 a lower nucleotide diversity (Supplemental Table 5).

286 Overall, we demonstrate that for two out of four participants, the CPS is lower than  
287 100%, leading to inaccuracies when using the V1-V3 *env* to predict clonality of infected  
288 cells. Furthermore, we show compartmentalization between the viral populations  
289 identified by the V1-V3 *env* SGS method versus the FLIPS method. This could either

290 result from primer bias or from limited sampling depth, leading us to miss a large  
291 proportion of viral strains with intact V1-V3 *env* when using FLIPS, when the frequency  
292 of the former are less and thus are obscured by *env*-deleted strains.

293 **Rebounding sequences match intact proviruses and proviruses with major**  
294 **deletions or defects in the packaging signal**

295 In our previously conducted HIV-STAR study, proviral V1-V3 *env* SGS sequences  
296 from several subsets and anatomical compartments were linked to rebounding plasma  
297 sequences (5). Yet, no conclusions about the genomic structure of the NFL proviruses  
298 and their associated IS could be inferred, since these subgenomic sequences did not  
299 allow for such analysis. The FLIPS and MDA-ISLA data generated in the present study  
300 allowed for a deeper characterization of the proviral landscape through linkage of NFL  
301 proviral sequences to rebounding plasma sequences.

302 To determine if the FLIPS- and MDA-derived NFL sequences matched rebound  
303 plasma sequences, phylogenetic trees were constructed. In conducting this comparison,  
304 all sequences which belonged to an EIS were only included once. All sequences were  
305 then trimmed to the V1-V3 *env* region and aligned with the plasma-derived V1-V3 *env*  
306 sequences from several timepoints during rebound. Phylogenetic analysis was performed  
307 using ML trees constructed via PHYML v3.0 with 1000 bootstraps (Figure 5).

308 For participants STAR 10 and 4, one or more identical matches between rebound  
309 plasma sequences and defective proviral genomes could be observed (Figure 5). In fact,  
310 STAR 10 had three matches between rebounding V1-V3 *env* sequences and largely

311 deleted proviruses: one match to a provirus that was sampled only once with FLIPS,  
312 hence no IS recovered, and two to proviruses located in the *ZBTB20* gene and in an  
313 intergenic region on chromosome 8. STAR 4's plasma V1-V3 *env* sequences from all  
314 three timepoints during the ATI matched an NFL provirus with a PSI/MSD deletion. These  
315 observations further suggest that subgenomic SGS is unable to distinguish between  
316 distinct proviruses, which is reflected by a CPS smaller than 100% in these two  
317 participants (Supplemental Table 5).

318 For participants STAR 9 and STAR 11, a match was found between intact  
319 proviruses and rebounding plasma sequences (Figure 5). For STAR 9, a provirus found  
320 only once using FLIPS matched plasma sequences found at T2 (3/4 plasma sequences  
321 from that timepoint) and T4. For STAR 11, an intact provirus that was found using both  
322 FLIPS and MDA-assisted NFL proviral sequencing, could be linked to a plasma virus at  
323 T2 (1 out of 3 plasma sequences from that timepoint). This provirus was found to be  
324 integrated in the *ZNF141* gene, which belongs to the Krüppel-associated box domain  
325 (KRAB) containing zinc finger nuclease family. Interestingly, the same viral sequences  
326 were not identified in the plasma from rebounding timepoints T3 and T4.

327 To investigate how the proviruses that could be linked to rebounding viruses  
328 compare to the historic plasma and proviral V1-V3 *env* sequences generated during the  
329 original HIV-STAR study, including sequences stemming from different anatomical  
330 compartments, the trimmed V1-V3 *env* region from the MDA- and FLIPS- derived NFL  
331 sequences were aligned with SGS-derived and MDA-derived V1-V3 *env* sequences.  
332 Subsequently, phylogenetic trees were constructed for each participant, where

333 sequences belonging to an EIS including one or more MDA or FLIPS derived V1-V3 *env*  
334 sequences were highlighted (Figure 6, Supplemental Figure 5). For STAR 9, the unique  
335 intact FLIPS provirus matching T2 and T4 plasma sequences falls within a cluster of  
336 proviral peripheral blood and GALT SGS V1-V3 *env* sequences (Figure 6, indicated by  
337 black arc). For STAR 10, a match between the *STAT5B* clone and proviral sequences  
338 from LN and peripheral blood could be observed, suggesting intermingling between these  
339 two compartments (Figure 6, indicated by black arc). For STAR 11, the cluster containing  
340 *ZNF141*, which could be linked to potential residual viremia, also matches T0 plasma  
341 sequences, suggesting a phylogenetic relationship to the founder virus (Figure 6,  
342 indicated by black arc).

343 In conclusion, by performing MDA-mediated NFL and ISA, we identified several  
344 proviruses with matched IS that linked to sequences from plasma before and/or during  
345 an ATI. Multiple of these proviruses displayed major defects of the packaging signal,  
346 raising the question whether these are still capable of producing viremia. Furthermore,  
347 some intact proviral sequences could be linked to multiple anatomical compartments,  
348 suggesting that certain clones harboring genome-intact proviruses can traffic between  
349 different compartments.



## 350 Discussion

351 Stable integration of HIV-1 genomes into the DNA of host cells leads to the  
352 establishment of a persistent HIV-1 latent reservoir. While most of these integrated  
353 proviruses are defective, a small proportion are genetically intact and fully capable of  
354 producing infectious virions upon latency reversal (7,24,26,36–41). The proportion of  
355 genetically intact HIV-1 proviruses, as measured by Intact Proviral DNA Assay (IPDA),  
356 has been shown to decay slowly, with an estimated average half-life of 4 years during the  
357 first 7 years of suppression, and 18.7 years thereafter (42). This long half-life can in part  
358 be explained by continuous clonal expansion of infected cells harboring these genetically  
359 intact HIV-1 proviruses (30,43). While this phenomenon is well-established, the  
360 contribution of clonally expanded HIV-1 infected cells to refueling viremia upon treatment  
361 interruption remains underexplored. Previously, others have tried to characterize  
362 rebounding viruses by phylogenetically linking these to proviral sequences and viral  
363 sequences obtained by viral outgrowth assays (VOA), with limited success. While two  
364 studies were unable to find links between rebounding sequences and viral sequences  
365 recovered by VOA (44,45), two other groups did find several links using similar techniques  
366 (13,46). However, these latter studies were performed in the context of interventional  
367 clinical trials and the IS of these viruses remained unknown. In addition, two groups were  
368 able to link proviral sequences to rebound sequences, though only a small part of the  
369 proviral genome was queried (21,47). We previously conducted the HIV-STAR clinical  
370 study, where SGS on the V1-V3 *env* region was used to link proviral sequences to  
371 rebounding plasma sequences (5). We found multiple links between proviral sequences  
372 and rebounding plasma sequences, however, this study was limited by the sequencing

373 of a small subgenomic region of the proviruses. In the current study, we used a  
374 combination of NFL sequencing, ISA and MDA-mediated IS/NFL sequencing to more  
375 accurately define the source of rebounding virus detected during ATI in a subset of HIV  
376 STAR participants.

377 We first showed that large discrepancies exist between different techniques to  
378 assess clonal expansion of HIV-1 infected cells. These discrepancies are often the result  
379 of primer biases, which dictate which proviruses are amplified. This has important  
380 implications for HIV-1 reservoir research, as some assays will be unable to detect  
381 potentially relevant proviruses. In addition, we demonstrated that the use of a short  
382 subgenomic region of the HIV-1 genome (*V1-V3 env*) to assess clonality of infected cells  
383 can lead to inaccurate results. This was shown by the recovery of distinct NFL proviruses,  
384 integrated at different sites, displaying identical *V1-V3 env* sequences. Similar  
385 observations were made in a recently published study, where P6-PR-RT sequences were  
386 compared to matched NFL/IS sequences (30). They found multiple instances of unique  
387 proviral P6-PR-RT sequences, with distinct IS. Taken together, we conclude that  
388 evaluating clonality of HIV-1 infected cells based on the assessment of a subgenomic  
389 region should be done with caution.

390 We next set out to find links between NFL proviral sequences and sequences  
391 found in the plasma during different stages of an ATI. First, we identified several links  
392 between defective proviruses and rebounding plasma viruses. Interestingly, for  
393 participant STAR 4, a link was found with a provirus containing a small packaging signal  
394 deletion. It has been shown previously that proviruses with such defects are still capable

395 of producing infectious virions, though with significantly lower efficiency (48). Therefore,  
396 we cannot exclude the possibility that the detected sequences in the plasma at rebound  
397 originate from such proviruses. Three other defective proviruses linked to rebound  
398 viruses, all in participant STAR 10, contain large internal deletions, making it unlikely that  
399 these are the real source of the virus rebounding during ATI. Rather, these are probably  
400 related proviruses, as they share an identical V1-V3 *env* sequence. Two previous studies  
401 that tried to link proviral sequences to rebound sequences, based on full *env* sequences,  
402 concluded that while they were not able to directly link the proviral sequences to the  
403 rebounding ones, the rebounding sequences could often be accounted for by  
404 recombination (45,46). Because we assessed only a small portion of the *env* gene (V1-  
405 V3 region), we were not able to comprehensively study recombination events, though we  
406 hypothesize that recombination may be a probable cause of identical overlap between  
407 defective proviral sequences and rebounding virus sequences.

408 We further identified two links between genetically intact NFL proviruses and  
409 plasma viruses emerging upon treatment interruption. The first link was found in  
410 participant STAR 9, where an intact provirus obtained with FLIPS could be linked to  
411 plasma virus at T2 and T4. Because this provirus was not retrieved in an MDA reaction,  
412 the IS remains unknown. Interestingly, this virus was first sampled at T2 and persisted  
413 into T4, which suggests that this virus emerged during the phase of an ATI when the viral  
414 load was still undetectable. In participant STAR 11, an intact provirus integrated in the  
415 *ZNF141* gene could be linked to plasma virus at T2 during an ATI. Another recent  
416 publication found a clonal infected cell population with IS in the *ZNF721/ABCA11P* gene,  
417 that contributed to persistent residual viremia which was not suppressed by ART (20).

418 This gene is located at the extreme end of chromosome 4, and belongs to the KRAB-  
419 containing zinc finger nuclease family. This integration event shows great similarities with  
420 the provirus we identified in the *ZNF141* gene, which also belongs to the KRAB-containing  
421 zinc finger nuclease family and which is located on chromosome 4, just upstream of the  
422 *ZNF721/ABCA11P* gene. Interestingly, three other studies also described infected cell  
423 clones harboring a genetically intact provirus integrated in the *ZNF721/ABCA11P* gene,  
424 suggesting that this region is a particular hotspot for the persistence of genetically intact  
425 proviruses (14, 20, 27). Because the plasma virus that was linked to our *ZNF141* clone  
426 stems from T2, the latest timepoint with undetectable viral load during the ATI, but did not  
427 persist in the later timepoints (T3 and T4), we cannot exclude that the virus we sampled  
428 emerged as a result of continuous virus shedding, as described by Halvas *et al.* (20),  
429 rather than ‘true’ rebounding virus. Previously, it was suggested that the origin of  
430 rebounding plasma viruses includes clonally expanded infected cells that are  
431 transcriptionally active before TI (21). Similarly, a recent study found several overlaps  
432 between monotypic low-level residual viremia sequences, which persisted for years, and  
433 rebound plasma sequences (19). These two findings, together with the observations by  
434 Halvas *et al.* (20), leads to the expectation that the provirus integrated in the *ZNF141*  
435 gene is a prime candidate to contribute to viral rebound, however, our current data does  
436 not support this. Off course, we cannot exclude that this viral strain was not identified at  
437 T3 and T4 because it was obscured by other rebound viruses, causing us to miss it.

438 In a recent study it was observed that ‘elite controllers’ (EC), individuals that control  
439 HIV-1 infection spontaneously, often carry genetically intact proviral sequences  
440 integrated at spots associated with ‘deep latency’, which persist over time and are not

441 cleared by the immune system (35). In one EC, they described a persistently infected cell  
442 population with an intact provirus integrated in the *ZNF274* gene, which is associated with  
443 highly condensed chromatin. Interestingly, we also observed a clonally expanded infected  
444 cell population in the peripheral blood TEM fraction from STAR11, with a genetically intact  
445 provirus integrated in the *ZNF274* gene. Despite the rather large size of the clone, we did  
446 not observe the emergence of the corresponding viral sequence in the plasma during the  
447 ATI, which is in agreement with its presumed 'deep latent' state. In fact, it is possible that  
448 because of the heterochromatin state of the DNA at this spot, this provirus would tend to  
449 remain latent. Alternatively, we cannot exclude that this virus was not identified during the  
450 ATI due to timing of our specimen collection. Indeed, it is possible that this virus would be  
451 detected if the treatment interruption would have been prolonged and if the participant  
452 was sampled at later time-points, especially knowing that transcription at this specific IS  
453 could be diminished and, if possible at all, would need more time to complete. These  
454 findings add to the current understanding that not all genetically intact proviral sequences  
455 contribute to the 'replication competent HIV-1 viral reservoir', as some are unlikely to  
456 rebound due to an unfavorable IS, though they may possess all the necessary attributes  
457 to rebound under specific conditions.

458 We acknowledge several limitations in this study. The first one is the limited  
459 sampling from tissue compartments, possibly causing us to miss important rebound  
460 lineages. Indeed, it has been shown that tissues, including lymph nodes and GALT,  
461 harbor most of the HIV-1 latent reservoir, orders of magnitude higher than the peripheral  
462 blood compartment (49). Whether there is compartmentalization between different  
463 anatomical compartments is under debate. Several studies, including our previously

464 conducted HIV-STAR study, have suggested that there is limited compartmentalization  
465 between the HIV-1 proviral sequences recovered from lymph nodes and from peripheral  
466 blood (5,23,45,50,51), based on identical proviral sequences and/or IS shared between  
467 both compartments. In contrast, another recently published study reports partial  
468 compartmentalization between lymph nodes and peripheral blood when specifically  
469 enriching for tissue resident CD4+ T cells, based on IS sequencing results (52). In  
470 addition, our previous HIV-STAR study did not show evidence of any enrichment of  
471 rebounding sequences stemming from specific anatomical compartments (5), justifying  
472 our decision to focus the current study primarily on the peripheral blood compartment.  
473 The second limitation of the current study is that the link to plasma rebounding sequences  
474 is based on the V1-V3 *env* region, rather than on plasma NFL sequences. This means  
475 that we cannot exclude the possibility that links between proviral sequences and  
476 rebounding plasma sequences are the result of false V1-V3 *env* matches, however the  
477 CPS for the V1-V3 *env* region for participants STAR 9 and STAR 11, which display links  
478 between intact proviral sequences and plasma rebound sequences, was calculated at  
479 100%.

480 In conclusion, our data show that reservoir characterization using multiple  
481 methods, including ISA, NFL proviral sequencing and a combination of both, one can  
482 identify matches between proviral sequences and plasma sequences emerging during an  
483 ATI, however these matches are rare. We report a link between a genome-intact provirus  
484 integrated in the *ZNF141* gene and a plasma sequence recovered during an ATI. This  
485 finding further adds to the body of evidence that genes of the KRAB-containing zinc finger  
486 nucleases are a particular hotspot for persistence of genetically intact proviruses (20,35).

487 Special focus on this class of genes, and the proviruses integrated within, will be needed  
488 in future studies to elucidate their role in reservoir persistence.

## 489 **Methods**

### 490 **Samples**

491 A total of four HIV-1 infected, ART treated participants were included in this study. All had  
492 an undetectable viral load (<20 copies/ml) for at least 1 year prior to treatment  
493 interruption, and all initiated ART during the chronic phase of infection. The participants  
494 characteristics are summarized in Supplemental Table 6. Participants were sampled  
495 longitudinally, prior to and during an ATI (Figure 1B). Anatomical compartments that were  
496 sampled, and corresponding cell subsets sorted from these, are summarized in  
497 Supplemental Table 1.

### 498 **CD4+ T cell subset sorting**

499 Cryopreserved PBMCs were thawed and CD4+ T cell enrichment was carried out with  
500 negative magnet-activated cell sorting (Beckton Dickinson, BD IMag™, Cat. No. 557939).  
501 CD4+ T cells were stained with the following monoclonal antibodies: CD3 (Becton  
502 Dickinson, Cat. No. 564465), CD8 (Becton Dickinson, Cat. No. 557746), CD45RO  
503 (Becton Dickinson, Cat. No. 555493), CD27 (Becton Dickinson, Cat. No. 561400), CCR7  
504 (Becton Dickinson, Cat. No. 560765) and a fixable viability stain (Becton Dickinson, Cat.  
505 No. 565388). Fluorescence-activated cell sorting was used to sort stained peripheral  
506 blood-derived CD4+ T cells into naïve CD4+ T cells (CD45RO-, CD45RA+), central  
507 memory CD4+ T cells (CD3+ CD8- CD45RO+ CD27+), transitional memory CD4+ T cells  
508 (CD3+ CD8- CD45RO+, CD27+ CCR7-) and effector memory CD4+ T cells (CD3+ CD8-  
509 CD45RO+ CD27-), GALT cells into CD45+ cells and cells from lymph nodes into central



510 memory CD4<sup>+</sup> T cells (CD3<sup>+</sup> CD8<sup>-</sup> CD45RO<sup>+</sup> CD27<sup>+</sup>) and effector memory CD4<sup>+</sup> T cells  
511 (CD3<sup>+</sup> CD8<sup>-</sup> CD45RO<sup>+</sup> CD27<sup>-</sup>), using a BD FACSJazz cell sorter machine, as previously  
512 described (5). A small fraction of each sorted cell population was analyzed by flow  
513 cytometry to check for purity, which was over 95% on average. Flow cytometry data was  
514 analyzed using FlowJo software (Tree-Star).

### 515 **Droplet digital PCR (ddPCR)**

516 Sorted cells were pelleted and lysed in 100 $\mu$ L lysis buffer (10mM TRisHCl, 0.5% NP-40,  
517 0.5% Tween-20 and proteinase K at 20mg/ml) by incubating for 1 hour at 55°C and 15  
518 min at 85°C. HIV-1 copy number was determined by a total HIV-1 DNA assay on droplet  
519 digital PCR (Bio-Rad, QX200 system), as described previously (53). PCR amplification  
520 was carried out with the following cycling program: 10 min at 98°C; 45 cycles (30 sec at  
521 95°C, 1 min at 58°C); 10 min at 98°C. Droplets were read on a QX200 droplet reader  
522 (Bio-Rad). Analysis was performed using ddpcRquant software (54).

### 523 **Whole genome amplification (WGA)**

524 Cell lysates were diluted according to ddPCR HIV-1 copy quantification, so that less than  
525 30% of reactions contained a single proviral genome. Whole genome amplification was  
526 performed by multiple displacement amplification with the REPLI-g single cell kit (Qiagen,  
527 Cat. No. 150345), according to manufacturer's instructions. The resulting amplification  
528 product was split for downstream ISA, single genome/proviral sequencing, and, for  
529 selected reactions, near full-length HIV-1 sequencing.

### 530 **Single genome/proviral sequencing**

531 Single genome/proviral sequencing (SGS) of the V1-V3 region of *env* was performed as  
532 described before (55,56), with a few adaptations. The amplification consists of a nested  
533 PCR with the following primers: Round 1 forward (E20) 5'-  
534 GGGCCACACATGCCTGTGTACCCACAG-3' and reverse (E115) 5'-  
535 AGAAAAATTCCCCTCCACAATTAA-3'; round 2, forward (E30) 5'-  
536 GTGTACCCACAGACCCCAGCCCACAAG-3' and reverse (E125) 5'-  
537 CAATTTCTGGGTCCCCTCCTGAGG-3'. The 25  $\mu$ L PCR mix for the first round is  
538 composed of: 5  $\mu$ L 5X Mytaq buffer, 0.375  $\mu$ L Mytaq polymerase (Bioline, Cat. No. BIO-  
539 21105), 400 nM forward primer, 400 nM reverse primer and 1  $\mu$ L REPLI-g product. The  
540 mix for the second round has the same composition and takes 1  $\mu$ L of the first-round  
541 product as an input. Thermocycling conditions for first and second PCR rounds are as  
542 follows: 2 min at 94°C; 35 cycles (30 sec at 94°C, 30 sec at 60°C, 1 min at 72°C); 5 min  
543 at 72°C. Resulting amplicons were visualized on a 1% agarose gel and Sanger  
544 sequenced (Eurofins Genomics, Ebersberg, Germany) from both ends, using second  
545 round PCR primers.

#### 546 **Integration site loop amplification (ISLA)**

547 Integration site sequencing was carried out by integration site loop amplification (ISLA),  
548 as described by Wagner *et al.* (8), but with a few modifications. Firstly, the *env* primer  
549 used during the linear amplification step was omitted, as it was not necessary to recover  
550 the *env* portion of the provirus at a later stage. Therefore, the reaction was not split after  
551 the linear amplification, and the entire reaction was used as an input into subsequent  
552 decamer binding and loop formation. For some proviruses, an alternative set of primers

553 were used to retrieve the IS from the 5' end (Supplemental Table 7). Resulting amplicons  
554 were visualized on a 1% agarose gel and positives were sequenced by Sanger  
555 sequencing. Analysis of the generated sequences was performed using the 'Integration  
556 Sites' webtool developed by the Mullins lab;  
557 <https://indra.mullins.microbiol.washington.edu/integrationsites/>.

### 558 **Full-length individual proviral sequencing assay**

559 Proviral sequences from the genomic DNA of sorted subsets were recovered by the Full-  
560 length Individual Proviral Sequencing (FLIPS) assay as first described by Hiener *et al.*  
561 (28) with some minor alterations. Briefly, the assay consists of two rounds of nested PCR  
562 at an end-point dilution where 30% of the wells are positive. This yields proviral fragments  
563 of up to 9 kb using the following primers for the first round BLOuterF (5'-  
564 AAATCTCTAGCAGTGGCGCCCGAACAG-3') and BLOuterR (5'-  
565 TGAGGGATCTCTAGTTACCAGAGTC-3') followed by a second round using primers  
566 275F (5'-ACAGGGACCTGAAAGCGAAAG-3') and 280R (5'-  
567 CTAGTTACCAGAGTCACACAACAGACG-3'). The cycling conditions are 94°C for 2 m;  
568 then 94°C for 30 s, 64°C for 30 s, 68°C for 10 m for 3 cycles; 94°C for 30 s, 61°C for 30  
569 s, 68°C for 10 m for 3 cycle; 94°C for 30 s, 58°C for 30 s, 68°C for 10 m for 3 cycle; 94°C  
570 for 30 s, 55°C for 30 s, 68°C for 10 m for 21 cycle; then 68°C for 10 m. For the second  
571 round, 10 extra cycles at 55°C are included. The PCR products were visualized using  
572 agarose gel electrophoresis. Amplified proviruses from positive wells were cleaned using  
573 AMPure XP beads (Beckman Coulter), followed by a quantification of each cleaned  
574 provirus with Quant-iT PicoGreen dsDNA Assay Kit (Invitrogen). Next, an NGS library

575 preparation using the Nextera XT DNA Library Preparation Kit (Illumina) with indexing of  
576 96-samples per run was used according to the manufacturer's instructions, except that  
577 input and reagents volumes were halved and libraries were normalized manually. The  
578 pooled library was sequenced on a MiSeq Illumina platform via 2x150 nt paired-end  
579 sequencing using the 300 cycle v2 kit.

#### 580 **Near full-length provirus amplification from MDA reactions**

581 MDA reactions containing a potentially clonal proviral sequence were subjected to near  
582 full-length proviral sequencing, using either a single-amplicon approach (24), a four-  
583 amplicon approach (30), or a five-amplicon approach (14), as previously described. In  
584 case of the multiple amplicon approaches, amplicons were pooled equimolarly and  
585 sequenced as described above.

#### 586 ***De Novo* assembly of HIV-1 proviruses and analysis**

587 The generated sequencing data from either FLIPS or multiple amplicon approaches was  
588 demultiplexed and used to *de novo* assemble individual proviruses using a custom  
589 inhouse pipeline. In short, the workflow consists of following steps: (i) check of  
590 sequencing quality for each library using FastQC  
591 (<http://www.bioinformatics.babraham.ac.uk/projects/fastqc>) and removal of Illumina  
592 adaptor sequences and trimming of 5' and 3' terminal ends. (ii) The trimmed reads are  
593 fed to the MEGAHIT (57) *de novo*-assembler generating multiple contigs for each library.  
594 (iii) Per library, all *de novo* contigs were checked using blastn against the HXB2 reference  
595 virus as a filter to exclude non-HIV-1 contigs in the following analysis steps. (iv)

596 Subsequently, the trimmed reads were mapped against the *de novo* assembled HIV-1  
597 contigs to enable the calling of the final majority consensus sequence of each provirus.  
598 Alignments of proviral sequences for each participant were made via MAFFT (58) and  
599 manually inspected via MEGA7 (59). The generated HIV-1 proviruses were categorized  
600 as intact or defective as described previously (24). Phylogenetic trees were constructed  
601 using PhyML v3.0 (60) (best of NNI and SPR rearrangements) and 1000 bootstraps.  
602 MEGA7 (59) and iTOL v5 (61) were used to visualise phylogenetic trees.

### 603 **Statistical analysis**

604 P-values in figure 2A test for a difference in the proportion of unique IS between TCM and  
605 TEM. P-values were calculated using “prop.test” command in R versions 3.6.2 (62).  
606 Infection frequencies for FLIPS data were calculated by expressing the total number of  
607 identified HIV positive cells as a proportion of all cells analysed. The infection frequency  
608 was compared across cellular subsets using a logistic regression on the number of cells  
609 positive for HIV and total number of cells using “glm” function in R. Interaction between  
610 participant and cellular subset was detected ( $P < 0.001$ ) and included in the logistic  
611 regression. P-values were calculated using the “Anova” function from the “car” package  
612 in R (63).

### 613 **Data availability statement**

614 Data will be uploaded to public repositories upon acceptance of the manuscript.

### 615 **Study approval**

616 This study was approved by the Ethics Committee of the Ghent University Hospital  
617 (Belgian registration number: B670201525474). Written informed consent was obtained  
618 from all study participants.

619 **Author contributions**

620 BC, LL, LF, SP and LV conceptualized the experiments. MADS processed the samples  
621 from the initial HIV STAR study, including cell isolation from peripheral blood and tissue,  
622 and she performed cell sorting and single-genome sequencing. BC and YN performed  
623 experiments involving cell sorting, multiple displacement amplification, single-genome  
624 sequencing and integration site sequencing. LL and ZB performed experiments involving  
625 near full-length proviral sequencing. BC, LL, BV, JSE and TS analyzed data and  
626 performed associated analyses. BC, LL, TS and BV made figures and tables. BC and LL  
627 wrote the manuscript. All co-authors edited and approved the manuscript.

628

629

630

631

632

633

634

635

636

## 637 **Acknowledgements and funding sources**

638 We would like to acknowledge and thank all participants who donated samples to the  
639 HIV-STAR study, and all the MDs and study nurses that assisted with the sample  
640 collection. We would also like to thank Marion Pardons, Tine Struyve and Sofie Rutsaert  
641 for providing guidance during initial data analyses, for the constructive discussions and  
642 for critically reading the manuscript. We are grateful for the discussions with and input  
643 from James Mullins, Rafick Sékaly, Susan Pereira Ribeiro, Hadega Aamer, Sam Kint,  
644 Oleg Denisenko, Katie Fisher and Bethany Horsburgh. In addition, we would like to thank  
645 Kim De Leeneer, Céline Helsmoortel and Bram Parton for their assistance in performing  
646 MiSeq sequencing at UZ Ghent. This current research work was supported by the NIH  
647 (R01-AI134419, MPI: LV and LF) and the Research Foundation Flanders (S000319N and  
648 G0B3820N). LV was supported by the Research Foundation Flanders (1.8.020.09.N.00)  
649 and the Collen-Francqui Research Professor Mandate. SP was supported by the Delaney  
650 AIDS Research Enterprise (DARE) to Find a Cure (1U19AI096109 and 1UM1AI126611-  
651 01) and the Australian National Health and Medical Research Council (APP1061681 and  
652 APP1149990). The sample collection at UZ Ghent was supported by an MSD investigator  
653 grant (ISS 52777). BC and LL were supported by FWO Vlaanderen (1S28918N,  
654 1S29220N). BV was supported by a postdoctoral grant (12U7121N) of the Research  
655 Foundation - Flanders (Fonds voor Wetenschappelijk Onderzoek).

## 656 **Competing interests**

657 The authors declare that no conflict of interest exists.



## 658 **References**

- 659 1. Chun TW, et al. Presence of an inducible HIV-1 latent reservoir during highly active  
660 antiretroviral therapy. *Proc Natl Acad Sci U S A*. 1997;94(24):13193-13197.
- 661 2. Chun T, Fauci AS. Latent reservoirs of HIV : Obstacles to the eradication of virus.  
662 *Proc Natl Acad Sci U S A*. 1999;96(20):10958-10961.
- 663 3. Finzi D, et al. Identification of a reservoir for HIV-1 in patients on highly active  
664 antiretroviral therapy. *Science*. 1997;278(5341):1295-1300.
- 665 4. Chun TW, et al. Early establishment of a pool of latently infected, resting CD4(+) T  
666 cells during primary HIV-1 infection. *Proc Natl Acad Sci U S A*. 1998;95(15):8869-  
667 8873.
- 668 5. De Scheerder M-A, et al. HIV Rebound Is Predominantly Fueled by Genetically  
669 Identical Viral Expansions from Diverse Reservoirs. *Cell Host Microbe*.  
670 2019;26(3):347-358.
- 671 6. Wang Z, et al. Expanded cellular clones carrying replication-competent HIV-1  
672 persist, wax, and wane. *Proc Natl Acad Sci U S A*. 2018;115(11):E2575-E2584.
- 673 7. Simonetti FR, et al. Clonally expanded CD4+ T cells can produce infectious HIV-1  
674 in vivo. *Proc Natl Acad Sci U S A*. 2016;113(7):1883-1888.
- 675 8. Wagner TA, et al. Proliferation of cells with HIV integrated into cancer genes  
676 contributes to persistent infection. *Science*. 2014;345(6196):570-573.
- 677 9. Maldarelli F, et al. Specific HIV integration sites are linked to clonal expansion and  
678 persistence of infected cells. *Science*. 2014;345(6193):179-183.
- 679 10. Cohn LB, et al. HIV-1 integration landscape during latent and active infection. *Cell*.  
680 2015;160(3):420-432.

- 681 11. Boritz EA, et al. Multiple Origins of Virus Persistence during Natural Control of HIV  
682 Infection. *Cell*. 2016;166(4):1004-1015.
- 683 12. Hosmane NN, et al. Proliferation of latently infected CD4 + T cells carrying  
684 replication-competent HIV-1: Potential role in latent reservoir dynamics. *J Exp Med*.  
685 2017;214(4):959-972.
- 686 13. Salantes DB, et al. HIV-1 latent reservoir size and diversity are stable following brief  
687 treatment interruption. *J Clin Invest*. 2018;128(7):3102-3115.
- 688 14. Einkauf K, et al. Distinct chromosomal positions of intact HIV-1 proviruses. *J Clin*  
689 *Invest*. 2018;129(3):988-998.
- 690 15. Brennan TP, et al. Analysis of Human Immunodeficiency Virus Type 1 Viremia and  
691 Provirus in Resting CD4+ T Cells Reveals a Novel Source of Residual Viremia in  
692 Patients on Antiretroviral Therapy. *J Virol*. 2009;83(17):8470-8481.
- 693 16. Bailey JR, et al. Residual Human Immunodeficiency Virus Type 1 Viremia in Some  
694 Patients on Antiretroviral Therapy Is Dominated by a Small Number of Invariant  
695 Clones Rarely Found in Circulating CD4+ T Cells. *J Virol*. 2006;80(13):6441-6457.
- 696 17. Wagner TA, et al. An increasing proportion of monotypic HIV-1 DNA sequences  
697 during antiretroviral treatment suggests proliferation of HIV-infected cells. *J Virol*.  
698 2013;87(3):1770-1778.
- 699 18. Tobin NH, et al. Evidence that low-level viremias during effective highly active  
700 antiretroviral therapy result from two processes: expression of archival virus and  
701 replication of virus. *J Virol*. 2005;79(15):9625-9634.
- 702 19. Aamer HA, et al. Cells producing residual viremia during antiretroviral treatment  
703 appear to contribute to rebound viremia following interruption of treatment. 2020:1-

- 704 24.
- 705 20. Halvas EK, et al. HIV-1 viremia not suppressible by antiretroviral therapy can  
706 originate from large T cell clones producing infectious virus. *J Clin Invest.*  
707 2020;130(11) 5847-5857.
- 708 21. Kearney MF, et al. Origin of Rebound Plasma HIV Includes Cells with Identical  
709 Proviruses That Are Transcriptionally Active before Stopping of Antiretroviral  
710 Therapy. *J Virol.* 2016;90(3):1369-1376.
- 711 22. Lu C, et al. Relationship between intact HIV-1 proviruses in circulating CD4 + T  
712 cells and rebound viruses emerging during treatment interruption. *Proc Natl Acad*  
713 *Sci U S A.* 2018;115(48):11341-11348.
- 714 23. Von Stockenstrom S, et al. Longitudinal Genetic Characterization Reveals That Cell  
715 Proliferation Maintains a Persistent HIV Type 1 DNA Pool During Effective HIV  
716 Therapy. *J Infect Dis.* 2015;212(4):596-607.
- 717 24. Hiener B, et al. Identification of Genetically Intact HIV-1 Proviruses in Specific  
718 CD4+T Cells from Effectively Treated Participants. *Cell Rep.* 2017;21(3):813-822.
- 719 25. Cohn LB, et al. HIV-1 integration landscape during latent and active infection. *Cell.*  
720 2015;160(3):420-432.
- 721 26. Lee GQ, et al. Clonal expansion of genome-intact HIV-1 in functionally polarized  
722 Th1 CD4+ T cells. *J Clin Invest.* 2017;127(7):2689-2696.
- 723 27. Pinzone MR, et al. Longitudinal HIV sequencing reveals reservoir expression  
724 leading to decay which is obscured by clonal expansion. *Nat Commun.* 2019;10(1):  
725 728.
- 726 28. Laskey SB, et al. Evaluating Clonal Expansion of HIV-Infected Cells: Optimization

- 727 of PCR Strategies to Predict Clonality. Douek DC, ed. *PLOS Pathog.*  
728 2016;12(8):e1005689.
- 729 29. Lambrechts L, et al. Emerging PCR-Based Techniques to Study HIV-1 Reservoir  
730 Persistence. *Viruses*. 2020;12(2):1-12.
- 731 30. Patro SC, et al. Combined HIV-1 sequence and integration site analysis informs  
732 viral dynamics and allows reconstruction of replicating viral ancestors. *Proc Natl*  
733 *Acad Sci U S A*. 2019;116(51):25891-25899.
- 734 31. Clarridge KE, et al. Effect of analytical treatment interruption and reinitiation of  
735 antiretroviral therapy on HIV reservoirs and immunologic parameters in infected  
736 individuals. *PLoS Pathog*. 2018;14(1):e1006792.
- 737 32. Garner SA, et al. Interrupting antiretroviral treatment in HIV cure research : scientific  
738 and ethical considerations. *J Virus Erad*. 2017;3(2):82-84.
- 739 33. Ikeda T, et al. Recurrent HIV-1 integration at the BACH2 locus in resting CD4+ T  
740 cell populations during effective highly active antiretroviral therapy. *J Infect Dis*.  
741 2007;195(5):716-725.
- 742 34. Cesana D, et al. HIV-1-mediated insertional activation of STAT5B and BACH2  
743 trigger viral reservoir in T regulatory cells. *Nat Commun*. 2017;8(1):498.
- 744 35. Jiang C, et al. Distinct viral reservoirs in individuals with spontaneous control of  
745 HIV-1. *Nature*. 2020;585(7824):261–267.
- 746 36. Ho Y-C, et al. Replication-Competent Noninduced Proviruses in the Latent  
747 Reservoir Increase Barrier to HIV-1 Cure. *Cell*. 2013;155(3):540-551.
- 748 37. Bruner KM, et al. Defective proviruses rapidly accumulate during acute HIV-1  
749 infection. *Nat Med*. 2016;22(9):1043-1049.

- 750 38. Pollack RA, et al. Defective HIV-1 Proviruses Are Expressed and Can Be  
751 Recognized by Cytotoxic T Lymphocytes, which Shape the Proviral Landscape.  
752 *Cell Host Microbe*. 2017;21(4):494-506.
- 753 39. Bui JK, et al. Proviruses with identical sequences comprise a large fraction of the  
754 replication-competent HIV reservoir. Ross SR, ed. *PLOS Pathog*.  
755 2017;13(3):e1006283.
- 756 40. Bruner KM, et al. A quantitative approach for measuring the reservoir of latent HIV-  
757 1 proviruses. *Nature*. 2019;566(7742):120-125.
- 758 41. Coffin JM, et al. Clones of infected cells arise early in HIV-infected individuals. *JCI*  
759 *Insight*. 2019;4(12):e128432.
- 760 42. Peluso MJ, et al. Differential decay of intact and defective proviral DNA in HIV-1-  
761 infected individuals on suppressive antiretroviral therapy. *JCI Insight*.  
762 2020;5(4):e132997.
- 763 43. Liu R, et al. The forces driving clonal expansion of the HIV-1 latent reservoir. *Virology*  
764 *J*. 2020;17(1):4.
- 765 44. Lu C-L, et al. Relationship between intact HIV-1 proviruses in circulating CD4 + T  
766 cells and rebound viruses emerging during treatment interruption. *Proc Natl Acad*  
767 *Sci*. 2018;115(48):E11341-E11348.
- 768 45. Vibholm LK, et al. Characterization of Intact Proviruses in Blood and Lymph Node  
769 from HIV-Infected Individuals Undergoing Analytical Treatment Interruption. *J Virol*.  
770 2019;93(8):e01920-18.
- 771 46. Cohen YZ, et al. Relationship between latent and rebound viruses in a clinical trial  
772 of anti – HIV-1 antibody 3BNC117. *J Exp Med*. 2018;215(9):2311-2324.

- 773 47. Barton K, et al. Broad activation of latent HIV-1 in vivo. 2016;7(12731):1-8.
- 774 48. Pollack RA, et al. Defective HIV-1 Proviruses Are Expressed and Can Be  
775 Recognized by Cytotoxic T Lymphocytes, which Shape the Proviral Landscape.  
776 *Cell Host Microbe*. 2017;21(4):494-506.e4.
- 777 49. Estes JD, et al. Defining total-body AIDS-virus burden with implications for curative  
778 strategies. *Nat Med*. 2017;23(11):1271-1276.
- 779 50. Mcmanus WR, et al. HIV-1 in lymph nodes is maintained by cellular proliferation  
780 during antiretroviral therapy Graphical abstract. *J Clin Invest*. 2019;129(11):4629-  
781 4642.
- 782 51. Josefsson L, et al. The HIV-1 reservoir in eight patients on long-term suppressive  
783 antiretroviral therapy is stable with few genetic changes over time. *Proc Natl Acad*  
784 *Sci U S A*. 2013;110(51):E4987-96.
- 785 52. Wu VH, et al. Assessment of HIV-1 integration in tissues and subsets across  
786 infection stages Find the latest version : *JCI Insight*. 2020;5(20):139783.
- 787 53. Rutsaert S, et al. Evaluation of HIV-1 reservoir levels as possible markers for  
788 virological failure during boosted darunavir monotherapy. *J Antimicrob Chemother*.  
789 2019;74(10):3030-3034.
- 790 54. Trypsteen W, et al. ddpcRquant: threshold determination for single channel droplet  
791 digital PCR experiments. *Anal Bioanal Chem*. 2015;407(19):5827-5834.
- 792 55. Josefsson L, et al. Hematopoietic Precursor Cells Isolated From Patients on Long-  
793 term Suppressive HIV Therapy Did Not Contain HIV-1 DNA. *J Infect Dis*.  
794 2012;206(1):28-34.
- 795 56. Von Stockenstrom S, et al. Longitudinal Genetic Characterization Reveals That Cell

- 796 Proliferation Maintains a Persistent HIV Type 1 DNA Pool during Effective HIV  
797 Therapy. *J Infect Dis.* 2015;212(4):596-607.
- 798 57. Li D, et al. MEGAHIT: an ultra-fast single-node solution for large and complex  
799 metagenomics assembly via succinct de Bruijn graph. *Bioinformatics.*  
800 2015;31(10):1674-1676.
- 801 58. Katoh K, et al. MAFFT: a novel method for rapid multiple sequence alignment based  
802 on fast Fourier transform. *Nucleic Acids Res.* 2002;30(14):3059-3066.
- 803 59. Kumar S, et al. MEGA7: Molecular Evolutionary Genetics Analysis Version 7.0 for  
804 Bigger Datasets. *Mol Biol Evol.* 2016;33(7):1870-1874.
- 805 60. Guindon S, et al. New Algorithms and Methods to Estimate Maximum-Likelihood  
806 Phylogenies: Assessing the Performance of PhyML 3.0. *Syst Biol.* 2010;59(3):307-  
807 321.
- 808 61. Letunic I, Bork P. Interactive Tree Of Life (iTOL) v4: recent updates and new  
809 developments. *Nucleic Acids Res.* 2019;47(W1):W256-W259.
- 810 62. "R Core Team." R: A language and environment for statistical computing. 2020.  
811 <https://www.r-project.org/>.
- 812 63. John F, Sanford W. *An R Companion to Applied Regression*. Third edit. Thousand  
813 Oaks CA: Sage; 2019. <https://socialsciences.mcmaster.ca/jfox/Books/Companion/>.
- 814

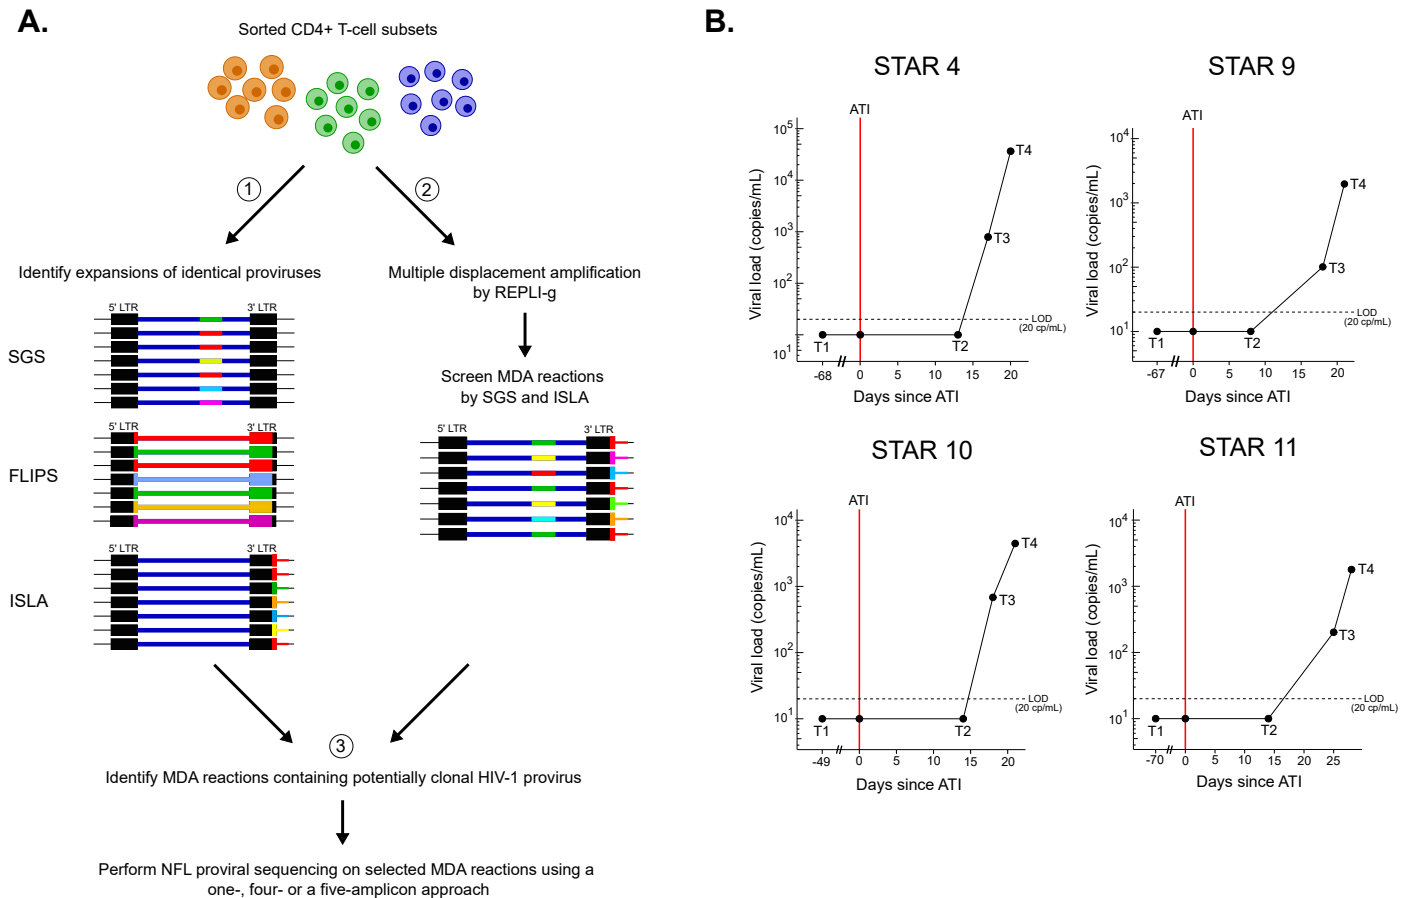

**Figure 1: Overview of the workflow for deep HIV-1 reservoir characterization and viral loads at each timepoint of sample collection for all participants.** (A) Workflow of deep HIV-1 reservoir characterization by single genome sequencing (SGS), full-length individual proviral sequencing (FLIPS), integration site loop amplification (ISLA) and multiple displacement amplification (MDA). In a first step, potentially clonal HIV-1 infected cells were identified by SGS, FLIPS and ISLA at the bulk level, on lysed sorted CD4+ T-cell subsets. In a second step, MDA with subsequent SGS and ISLA was performed on selected sorted cell lysates. In the final step, MDA reactions containing a potentially clonal provirus were identified and the NFL genome of the according provirus was amplified and sequenced. (B) Viral load (copies/mL) at each time of sample collection for all participants. The day of ATI initiation is indicated with a vertical red line. The plasma was sampled during ART (time point 1, T1), 8 to 14 days after ATI (time point 2, T2), at the first detectable viral load (time point 3, T3), and at rebound (time point 4, T4). Note that T1 is not shown to scale. The horizontal dashed lines indicate the limit of detection at 20 copies/mL. ATI = analytical treatment interruption.



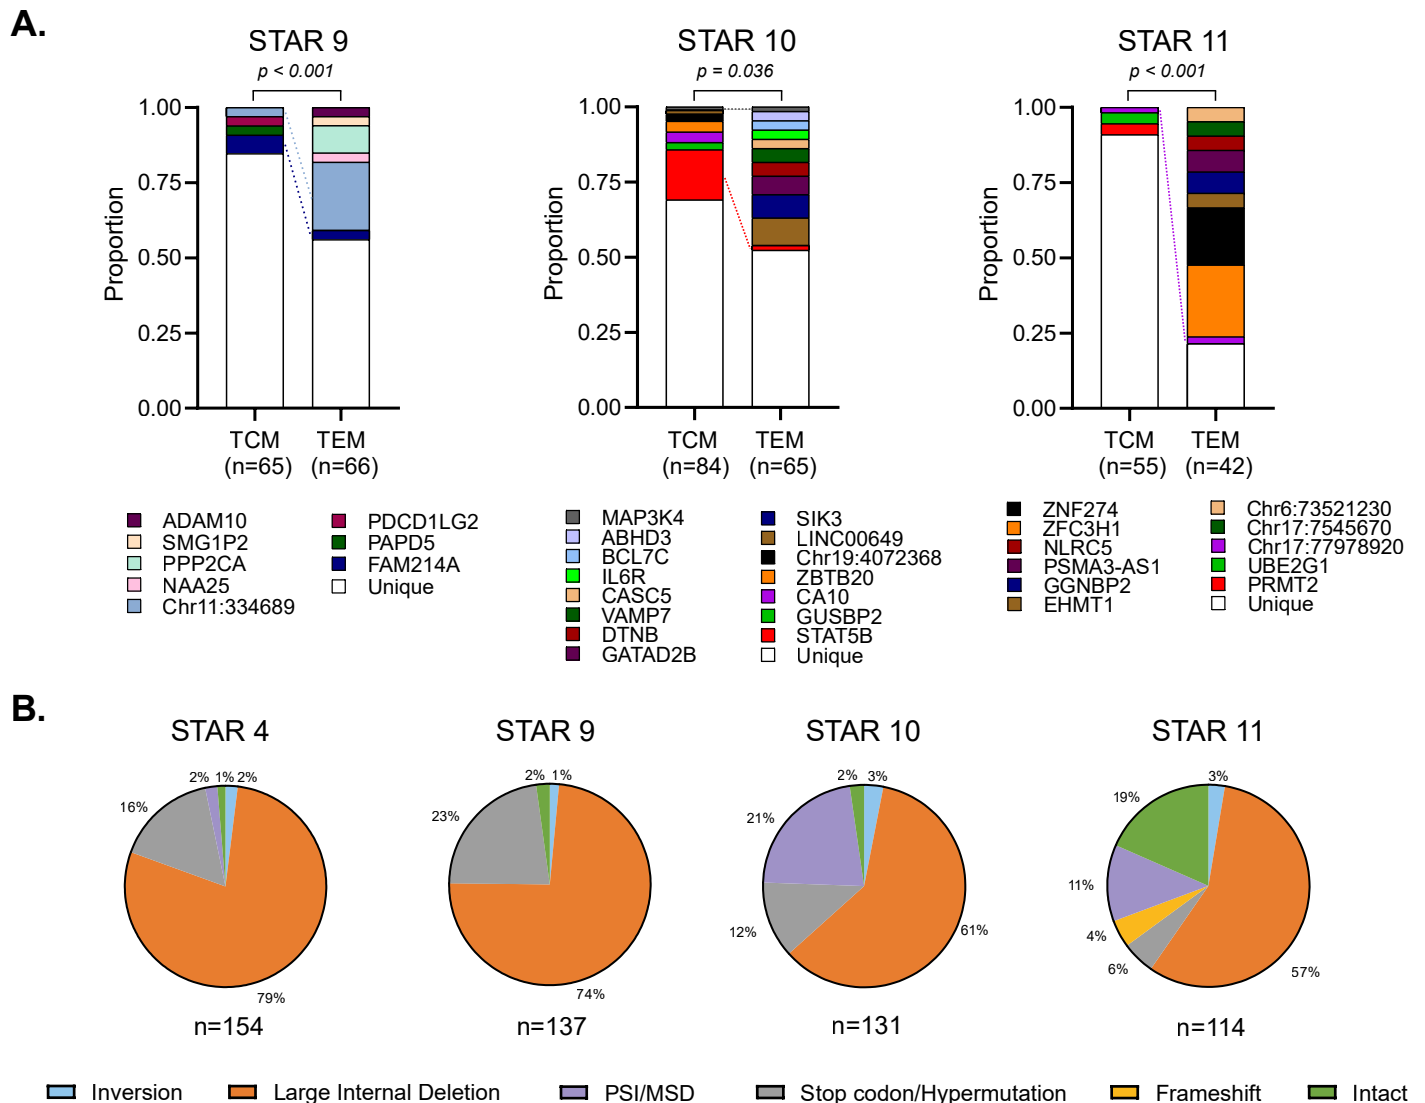

**Figure 2: Clonal HIV-1 integration sites and proviral near full-length genome sequences per category from different participants across different cell subsets before ATI.** (A) Proportions of retrieved integration sites (IS) by ISLA for participants STAR 9, STAR 10 and STAR 11 from TCM and TEM subsets from peripheral blood. IS found more than once are shown as colored proportions and represent clonally expanded HIV-1 infected cells. Identical IS found in both subsets are linked with dashed lines. P-values test was used for a difference in the proportion of unique IS between TCM and TEM. ISLA = integration site loop amplification, TCM = central memory T cell, TEM = effector memory T cell. (B) Proportions of intact and defective near full-length sequences from FLIPS within all sequenced proviruses from peripheral blood, GALT and lymph nodes for each participant. FLIPS = Full-Length Individual Provirus sequencing, GALT = gut-associated lymphoid tissue, PSI = packaging signal, MSD = major splice donor.

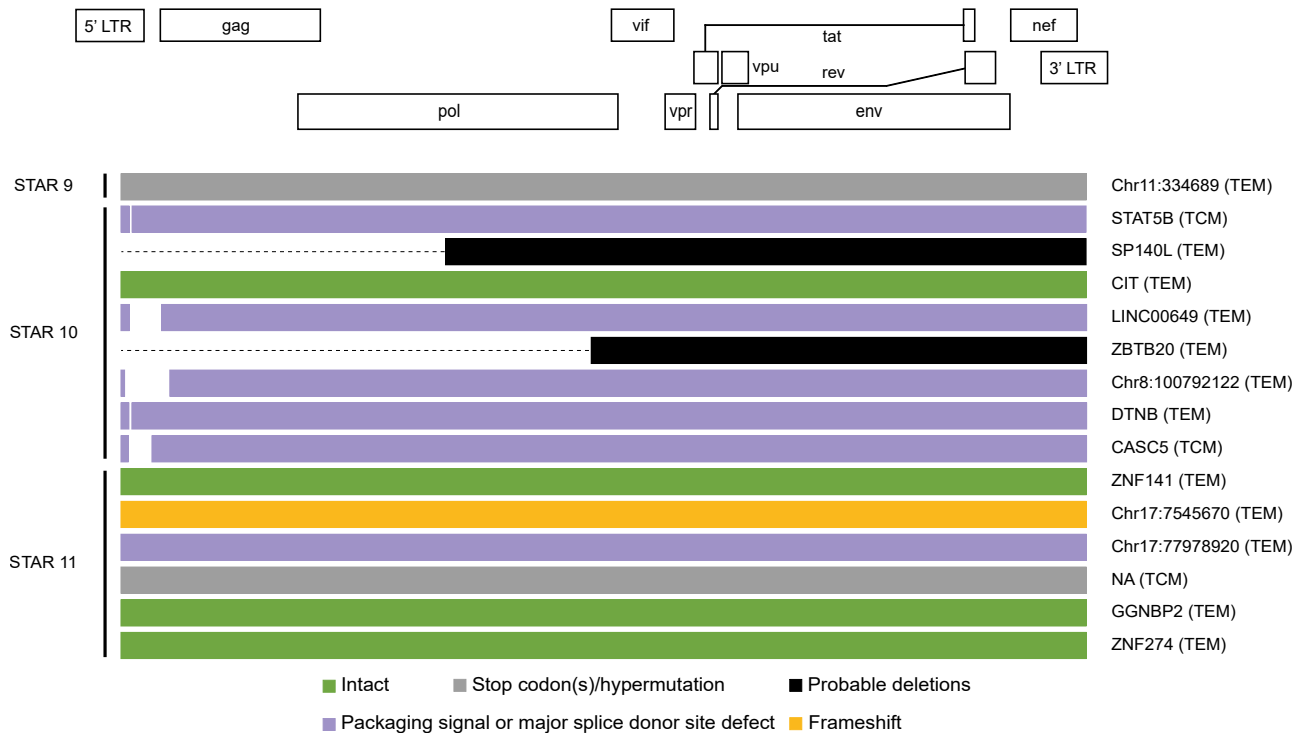

**Figure 3: Near full-length proviral HIV-1 genomes and associated integration sites recovered from the peripheral blood by MDA.** For each participant, the recovered proviral genome structures are shown aligned to the HXB2 reference sequence and corresponding integration sites, if available, are listed on the right hand side, together with the memory subset between brackets. For two proviruses (*SP140L* and *ZBTB20*) no near full-length genomes could be retrieved despite multiple attempts (Supplemental Table 4). The regions that could not be recovered are indicated by a dashed line. MDA = multiple displacement amplification, TCM = central memory T cell, TEM = effector memory T cell, NA = not available.

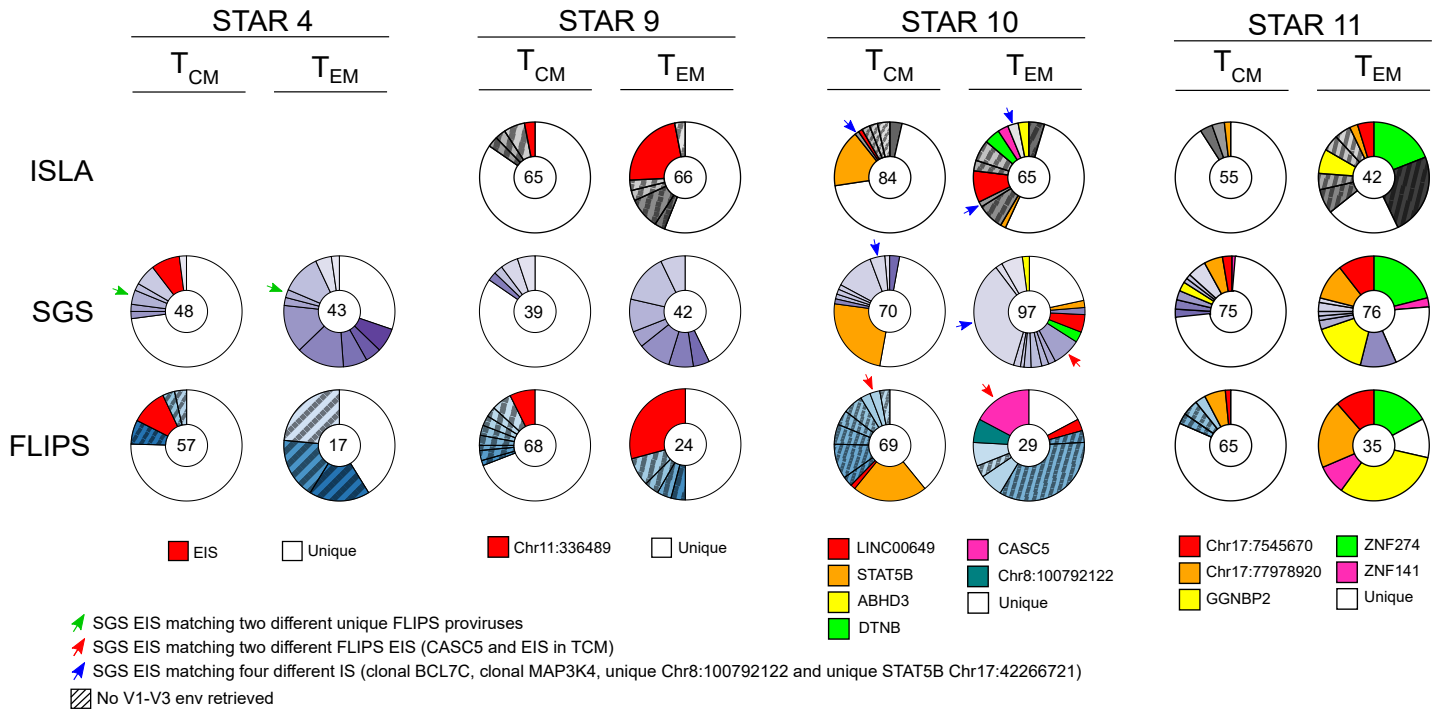

**Figure 4: Comparison of assays to identify potentially clonal HIV-1 infected cell populations.** The total number of examined integration sites (IS), V1-V3 *env* sequences and near full-length proviral (NFL) sequences is noted in the middle of each donut plot. Sequences found multiple times within the same assay are colored by a shade of grey, purple or blue (for ISLA, SGS and FLIPS respectively). When NFL or V1-V3 *env* sequences overlapped between assays, they were given a distinct standout color, and these are named in the legend. Populations of identical FLIPS or ISLA sequences that are not associated with a V1-V3 *env* sequence (due to deletions and/or primer mismatches) are shaded. Arrows are used to indicate discrepancies between the different assays. ISLA = integration site loop amplification, SGS = single-genome sequencing, FLIPS = Full-Length Individual Provirus sequencing, EIS = expansion of identical sequences.

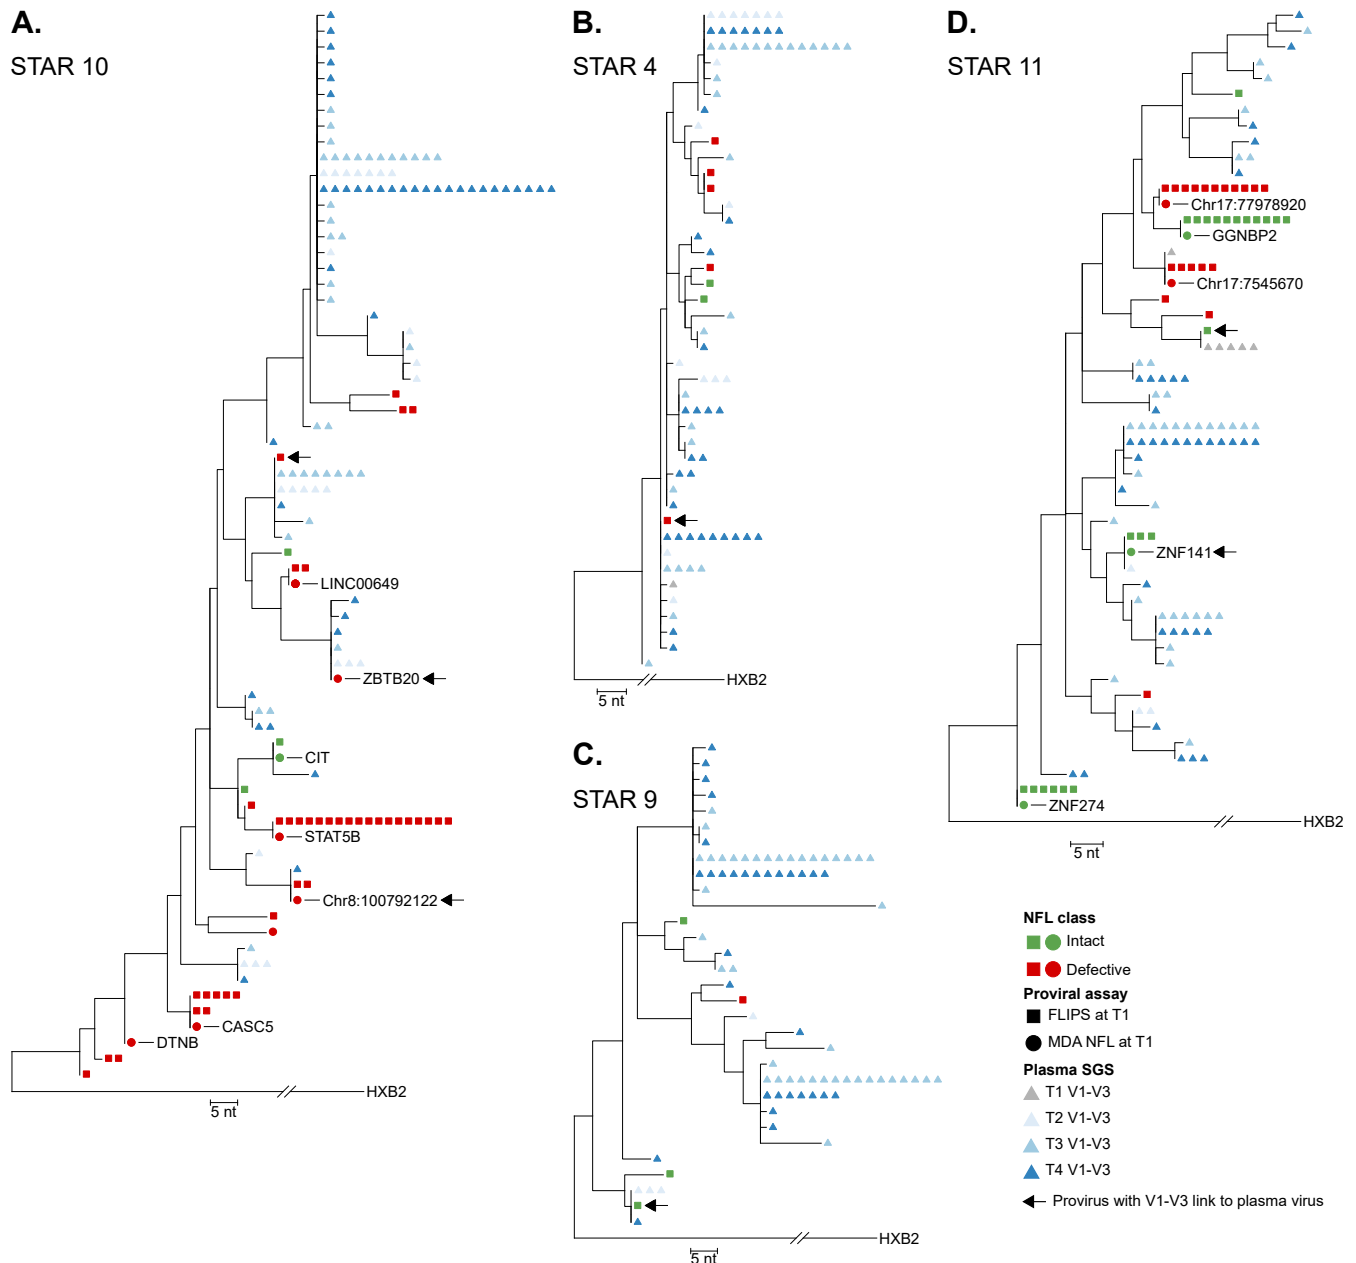

**Figure 5: Maximum-likelihood phylogenetic trees of V1-V3 env sequences derived from FLIPS- and MDA-derived intact and defective proviral sequences before ATI and rebounding plasma viruses during different stages of ATI.** Proviral sequences derived from FLIPS and MDA are shown as squares and circles respectively. The integration sites associated with MDA-derived proviruses are noted if available. Plasma sequences are shown as triangles where the colour indicates the timepoint during ATI. Arrows indicate identical matches between proviral and plasma V1-V3 env sequences. All trees are rooted to the HXB2 reference sequence. (A) In participant STAR 10, three identical matches between defective proviral and plasma rebound sequences were found. For two, the corresponding IS *ZBTB20* and *Chr8:100792122* could be recovered. (B) In participant STAR 4, only one match between a unique MSD deleted provirus and plasma sequences was observed. (C) In STAR 9, a match between a unique intact provirus and multiple plasma sequences from different timepoints were found. (D) In STAR 11, a rebounding plasma sequence could be linked to an expansion of identical intact NFL genomes located in the *ZNF141* gene. One unique intact provirus can be linked to a residual plasma sequence from T1. FLIPS = Full-Length Individual Provirus sequencing, MDA = multiple displacement amplification, ATI = analytical treatment interruption, IS = integration site, MSD = major splice donor, SGS = single-genome sequencing, NFL = near full-length.

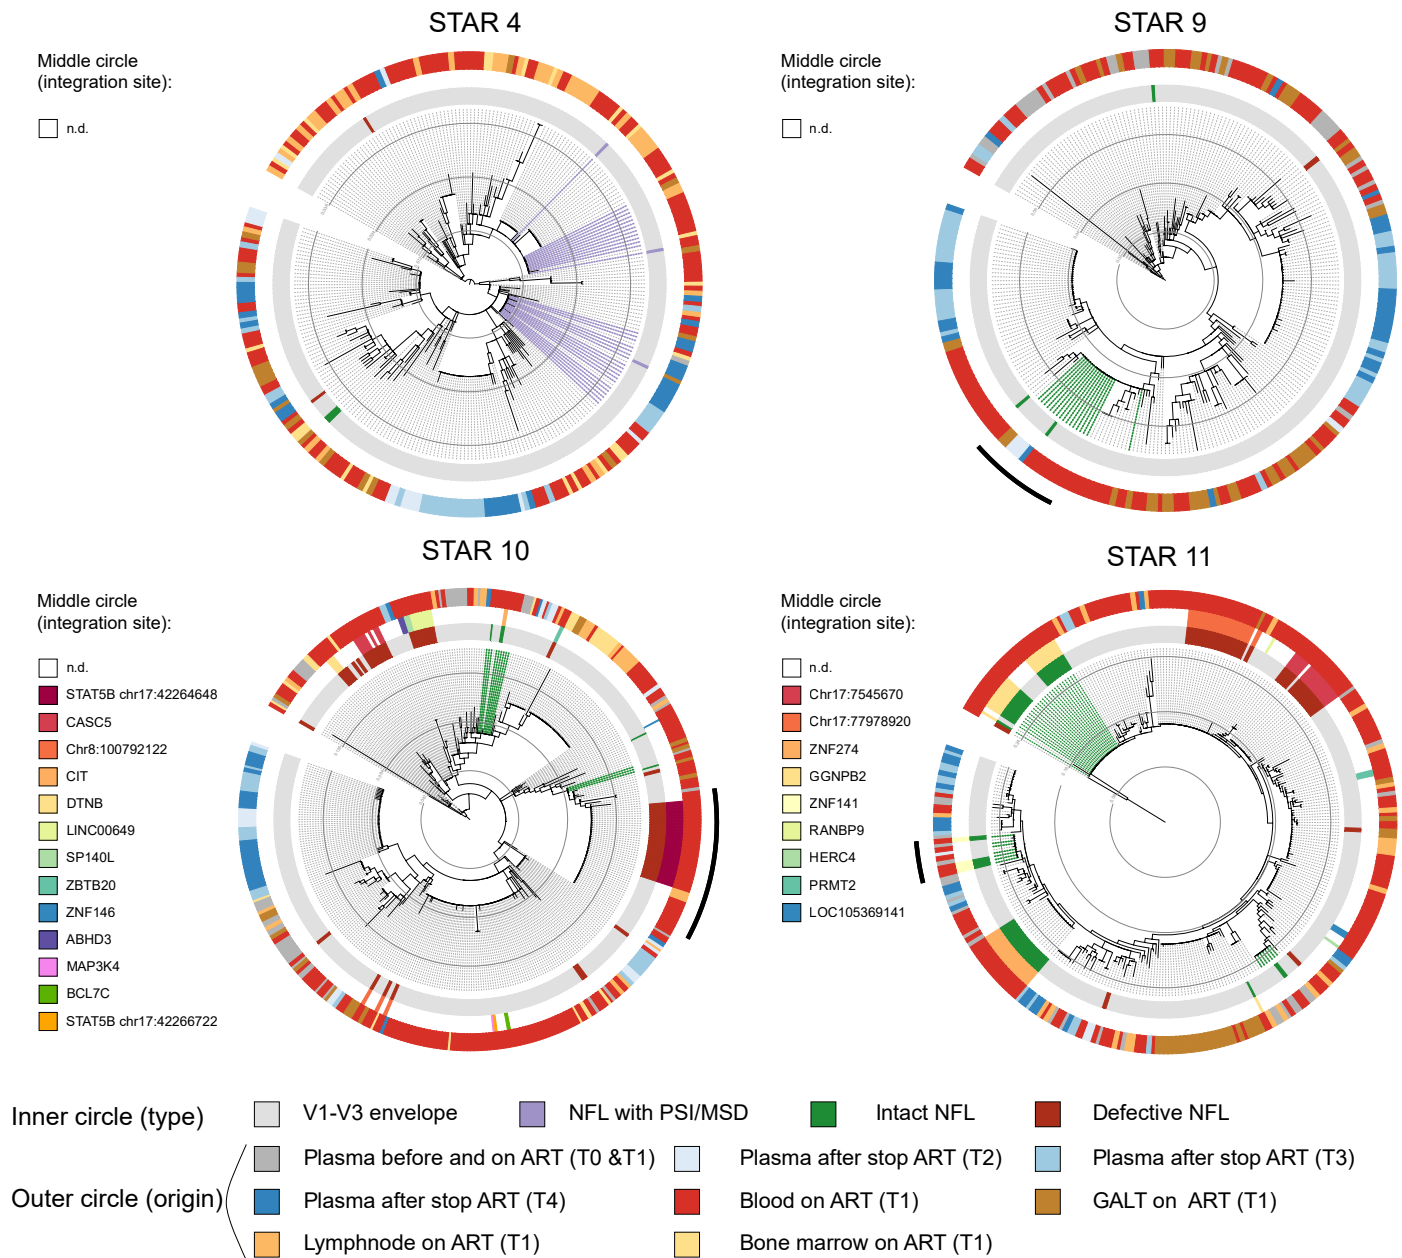

**Figure 6: Circular maximum likelihood phylogenetic trees for each participant using all generated proviral and plasma V1-V3 *env* sequences before and during different stages of the ATI.** The inner circle represents the sequence type, either obtained through single-genome sequencing (SGS) of the V1-V3 *env* region shown in grey and V1-V3 *env* trimmed near full-length (NFL) genomes in colors, respective of their intactness category. Clusters of identical sequences containing both subgenomic SGS and NFL are highlighted in bold dashed lines. The middle circle shows the integration site associated with MDA-derived proviruses (multiple displacement amplification) if available. The anatomical compartment origin of each plasma and proviral sequence is shown on the outer circle. The black arcs around the outer circles of STAR 9, STAR 10 and STAR 11 denote the discussed clusters of identical V1-V3 *env* sequences. ATI = analytical treatment interruption, PSI = packaging signal, MSD = major splice donor, n.d. = not determined.
